# Supplementary material for: Predicting the Adoption of a Sustainable Diet in Adults: A Cross-Sectional Study in Italy
Source: MDPI journal article supplement (doi:10.3390/nu15122784), 2023-06-17
Supplement: s1 [file s1]

## Supplemental

**Table S1.** Detailed description of the TPB core constructs measured in the study.

| TPB constructs                       | Description                                                                                                                                                                                                                                                                                                                                                                                                                                                                                                                                                                                                                                                                                                                                                                                                  |
|--------------------------------------|--------------------------------------------------------------------------------------------------------------------------------------------------------------------------------------------------------------------------------------------------------------------------------------------------------------------------------------------------------------------------------------------------------------------------------------------------------------------------------------------------------------------------------------------------------------------------------------------------------------------------------------------------------------------------------------------------------------------------------------------------------------------------------------------------------------|
| <b>Attitude</b>                      | It was directly measured by using four polar adjectives (e.g., not useful at all-very useful). Indirect attitude measures were calculated by multiplying eight outcome expectancy items representing the perceived likelihood that salient outcomes will occur if a SuDiet will be adopted by the subject (e.g., if I adopt a SuDiet in the next future, it will contribute to reduce the environmental impact: very unlikely/very likely), with the corresponding outcome evaluation items measured on unipolar scale anchored by desirability (e.g., reducing environmental impact is for me not desirable at all/very desirable).                                                                                                                                                                         |
| <b>Subjective norm</b>               | Injunctive and descriptive normative beliefs were considered. The formers were used to obtain an indirect measure of subjective norm by multiplying five injunctive beliefs referent items (e.g., my family think I should adopt a SuDiet in the next future: very unlikely/very likely), with the corresponding motivations to comply items (e.g., I'm interested if my family approve or disapprove my choices when it comes to food: not at all/very much). Three descriptive normative beliefs were instead used to assess the probability that relevant others (i.e., my family/partner/dear friends) will enact the behaviour in the next future. In addition, subjective norm was directly measured by four items (e.g., most of the people I value would approve I adopt a sustainable diet).        |
| <b>Perceived behavioural control</b> | Direct measures consisted of four items (e.g., I think that the adoption of a SuDiet in the next future is under my control: absolutely no/absolutely yes), among which one was used to measure self-efficacy (e.g., I believe that I am able to adopt a SuDiet in the next future: absolutely not/absolutely yes). In parallel, the indirect measure was obtained by multiplying five control belief factors (e.g., I will have more free time in the next future: very unlikely/very likely), with the corresponding control belief power items (e.g., having more free time would allow me to adopt a sustainable diet: very unlikely/very likely). Control beliefs assessed participants' perceptions about their ability to adopt a SuDiet in the next future despite intrinsic and extrinsic barriers. |
| <b>Behavioural intention</b>         | It was measured with four items (e.g., I intend to adopt a SuDiet in the next future: absolutely no/absolutely yes).                                                                                                                                                                                                                                                                                                                                                                                                                                                                                                                                                                                                                                                                                         |

**Table S2.** Anthropometric variables, socio-demographic characteristics, and food-related habits of respondents (n=838) and national absolute data (expressed as thousands).

|                                                  | Sample<br>N (%) | Italian population<br>N (%) |
|--------------------------------------------------|-----------------|-----------------------------|
| <i>Gender</i>                                    |                 |                             |
| Female                                           | 434 (51.8)      | 19,405.3 (50.1)             |
| Male                                             | 404 (48.2)      | 19,354.2 (49.9)             |
| <i>Age (years)</i>                               |                 |                             |
| 18–24                                            | 89 (10.6)       | 4,158.4 (11.9)              |
| 25–34                                            | 157 (18.7)      | 6,643.6 (19.0)              |
| 35–44                                            | 198 (23.6)      | 8,373.1 (24.0)              |
| 45–54                                            | 209 (24.9)      | 7,849.3 (22.5)              |
| 55–65                                            | 185 (22.1)      | 7,911.9 (22.7)              |
| <i>BMI (kg/m<sup>2</sup>)</i>                    |                 |                             |
| <25.0                                            | 533 (63.6)      | (56.2)                      |
| ≥25.0                                            | 305 (36.4)      | (43.8)                      |
| <i>Nationality</i>                               |                 |                             |
| Italian                                          | 818 (97.6)      | 5,542.1 (91.7)              |
| Other                                            | 20 (2.4)        | 5,047.0 (8.3)               |
| <i>Geographical area of residence</i>            |                 |                             |
| Nord-West                                        | 220 (26.3)      | 10,185.0 (26.1)             |
| Nord-East                                        | 168 (20.1)      | 7,396.1 (19.0)              |
| Centre                                           | 167 (19.9)      | 7,706.7 (19.8)              |
| South                                            | 192 (22.9)      | 9,305.4 (23.9)              |
| Islands                                          | 91 (10.9)       | 4,420.6 (11.3)              |
| <i>Size of residence (number of inhabitants)</i> |                 |                             |
| < 50,000                                         | 148 (17.7)      | 41.546,2 (68.9)*            |
| ≥ 50,000                                         | 690 (82.3)      | 18.813,3 (31.1)‡            |
| <i>Education</i>                                 |                 |                             |
| Primary/secondary                                | 510 (60.9)      | 44.936,9 (80,1)             |
| Tertiary                                         | 328 (39.1)      | 6,271.0 (11.2)              |
| <i>Occupation</i>                                |                 |                             |
| Employee                                         | 574 (68.5)      | 22,850.8 (59.4)             |
| Unemployed/retired/student                       | 264 (31.5)      | 5,636.4 (6.6)®              |
| <i>Monthly household net income (€)°</i>         |                 |                             |
| < EUR 900                                        | 49 (5.9)        | n.a.                        |
| EUR 900 – 1,499                                  | 144 (17.2)      | n.a.                        |
| EUR 1,500 – 2,499                                | 267 (31.9)      | n.a.                        |
| EUR 2,500 – 3,499                                | 176 (21.0)      | n.a.                        |
| ≥3,500                                           | 118 (14.1)      | n.a.                        |
| Do not wish to tell/do not know                  | 84 (10.0)       | n.a.                        |
| <i>Household members (n)</i>                     |                 |                             |
| 1-2                                              | 258 (30.8)      | 15.529 (60.4)               |
| ≥3                                               | 580 (69.2)      | 10.186 (39.6)               |
| <i>Responsibility in food purchase</i>           |                 |                             |
| Main responsible                                 | 601 (71.7)      | (48.1)                      |
| No main responsible                              | 237 (28.3)      | (51.9)                      |

|                                           |            |                     |
|-------------------------------------------|------------|---------------------|
| <i>Responsibility in meal preparation</i> |            |                     |
| Main responsible                          | 529 (63.1) | (32.7)              |
| No main responsible                       | 309 (36.9) | (67.3) <sup>#</sup> |
| <i>Frequency of eating out</i>            |            |                     |
| ≤ 1 time/week                             | 491 (58.6) | (54.5) <sup>•</sup> |
| 2-4 times/week                            | 249 (29.7) | (19.4) <sup>•</sup> |
| ≥ 5 times/week                            | 98 (11.7)  | (26.1) <sup>•</sup> |

Note: Data referred to Italian population has been retrieved from Eurostat (gender, 2018; age, 2018; geographical area of residence, 2018; BMI, 2014; occupation, 2019: <sup>⊕</sup> data refer only to the unemployed population), Istat (residence size, 2019: \* <59,999 inhabitants, † ≥60,000 inhabitants; education, 2011; nationality, 2016; household members, 2019), Italian Federation of Public Enterprises, FIPE (responsibility of food purchase, 2018; responsibility of food preparation, 2018: Italian adults who stated to cook every day, <sup>#</sup>Italian adults who stated to cook sometimes/never cook; frequency of eating out, 2018: <sup>•</sup>Italian adults who stated to eat out ≤ 1 or 2-3 meals per month, <sup>•</sup>Italian adults who stated to eat out 2/3 meals per week, <sup>•</sup>Italian adults who stated to eat out 4/5 meals per week); <sup>°</sup>Median equivalised net income for Italy (18-64 years) in 2019 corresponded to EUR 17,165, i.e., EUR 1.430 per month (Source: Eurostat); n.a.: not available.

**Table S3.** Median values (IR) of behavioural, normative and control beliefs.

| <b>Beliefs categories</b>               |                  | <b>Beliefs components</b> |                |  |
|-----------------------------------------|------------------|---------------------------|----------------|--|
| Behavioural                             | (1) <sup>#</sup> | (2) <sup>#</sup>          | (1)*(2)        |  |
| Positive impact on health               | 2.0 (1.0-2.0)    | 2.0 (1.0-3.0)             | 3.0 (1.0-6.0)  |  |
| Positive effect on environment          | 2.0 (1.0-2.0)    | 2.0 (1.0-2.0)             | 3.0 (1.0-4.0)  |  |
| Adoption of an ethical behaviour        | 2.0 (1.0-2.0)    | 2.0 (1.0-2.0)             | 2.0 (1.0-4.0)  |  |
| Satisfaction from a sensory perspective | 1.0 (0.0-2.0)    | 2.0 (1.0-2.0)             | 2.0 (0.0-4.0)  |  |
| Food habits modification                | 1.0 (0.0-2.0)    | 1.0 (0.0-2.0)             | 1.0 (0.0-2.0)  |  |
| Improvement of culinary skills          | 1.0 (0.0-2.0)    | 1.0 (1.0-2.0)             | 1.0 (0.0-4.0)  |  |
| Support to local economy                | 2.0 (1.0-2.0)    | 1.0 (1.0-2.0)             | 2.0 (1.0-4.0)  |  |
| Support to small/medium size farmers    | 2.0 (1.0-2.0)    | 1.0 (1.0-2.0)             | 2.0 (1.0-4.0)  |  |
| Normative (injunctive)                  | (3) <sup>#</sup> | (4)                       | (3)*(4)        |  |
| Partner                                 | 0.0 (0.0-1.0)    | 5.0 (4.0-6.0)             | 0.0 (0.0-6.0)  |  |
| Family                                  | 0.0 (-1.0-1.0)   | 5.0 (4.0-6.0)             | 0.0 (-2.0-6.0) |  |
| Dear friends                            | 0.0 (-1.0-1.0)   | 4.0 (3.0-5.0)             | 0.0 (-3.0-4.0) |  |
| Doctors/nutritionists/experts           | 1.0 (0.0-2.0)    | 5.0 (4.0-6.0)             | 2.0 (0.0-8.0)  |  |
| Institutions                            | 0.0 (-1.0-1.0)   | 4.0 (3.0-5.0)             | 0.0 (-2.0-5.0) |  |
| Normative (descriptive)                 | (5)              | (4)                       | (5)*(4)        |  |
| Partner                                 | 1.0 (0.0-2.0)    | 5.0 (4.0-6.0)             | 3.0 (0.0-7.0)  |  |
| Family                                  | 1.0 (0.0-2.0)    | 5.0 (4.0-6.0)             | 1.0 (0.0-6.0)  |  |
| Dear friends                            | 0.0 (-1.0-1.0)   | 4.0 (3.0-5.0)             | 0.0 (-2.0-5.0) |  |
| Control                                 | (6)              | (7)                       | (6)*(7)        |  |
| Informative labels on the products      | 5.0 (5.0-6.0)    | 2.0 (1.0-2.0)             | 8.0 (5.0-12.0) |  |
| Price reduction                         | 5.0 (4.0-6.0)    | 2.0 (1.0-2.0)             | 6.0 (4.0-12.0) |  |
| Free time available                     | 5.0 (4.0-5.0)    | 1.0 (0.0-2.0)             | 5.0 (0.0-10.0) |  |
| Not being alone                         | 5.0 (4.0-6.0)    | 1.0 (0.0-2.0)             | 5.0 (0.0-10.0) |  |
| Food variety in collective catering     | 5.0 (4.0-6.0)    | 1.5 (1.0-2.0)             | 6.0 (4.0-12.0) |  |

Note: <sup>#</sup>converted to bipolar scale (-3; +3); (1): Behavioural belief strength; (2): outcome evaluation; (3): injunctive belief strength; (4): motivation to comply; (5): descriptive belief strength; (6): control strength; (7): power control factors.

**Table S4.** Unstandardized coefficients (B) and standard error (SE) of intention and PBC as predictors of the consumption frequency of single food groups, and explained variance (R<sup>2</sup>).

|                                            | Intention |       | PBC      |       | R <sup>2</sup> |
|--------------------------------------------|-----------|-------|----------|-------|----------------|
|                                            | B         | SE    | B        | SE    |                |
| Wholegrain pasta or rice                   | -0.019    | 0.051 | 0.073    | 0.054 | 0.007          |
| Wholegrain bread and substitutes           | 0.007     | 0.052 | 0.099    | 0.057 | 0.021          |
| Pulses                                     | 0.117     | 0.060 | 0.125*   | 0.064 | 0.076          |
| Milk and yoghurt                           | 0.049     | 0.059 | 0.095    | 0.063 | 0.030          |
| White meat                                 | -0.118**  | 0.045 | 0.065    | 0.048 | 0.015          |
| Red meat, meat products                    | -0.217*** | 0.048 | 0.070    | 0.052 | 0.062          |
| Fish or sea foods                          | -0.058    | 0.064 | 0.224*** | 0.070 | 0.043          |
| Vegetables, all types                      | 0.146**   | 0.055 | 0.086    | 0.058 | 0.079          |
| Fruit, all types fresh and fresh juices    | 0.178**   | 0.062 | 0.080    | 0.066 | 0.083          |
| Nuts                                       | 0.155     | 0.081 | 0.137    | 0.087 | 0.067          |
| Olive oil to cook and to dress             | 0.009     | 0.044 | 0.100*   | 0.048 | 0.031          |
| Butter, margarine or cooking cream         | -0.039    | 0.044 | 0.030    | 0.047 | 0.001          |
| Carbonated and/or sugar-sweetened beverage | -0.128*   | 0.060 | -0.003   | 0.062 | 0.026          |
| Sweets                                     | -0.034    | 0.064 | -0.038   | 0.068 | 0.006          |
| Wine                                       | 0.020     | 0.051 | -0.031   | 0.055 | 0.001          |

Note: The positive or negative B value indicated the extend by which each single food consumption respectively increased or decreased when intention or PBC went up by 1 unit. \*p < 0.05; \*\* p < 0.01; \*\*\* p < 0.001. PBC: perceived behavioural control.
